# Supplementary material for: Dentists’ knowledge, attitudes and practices regarding Hepatitis B and C and HIV/AIDS in Sanandaj, Iran
Source: PubMed Central journal article supplement (PMC6299669; doi:10.1186/s12903-018-0685-1), 2018-12-18
Supplement: 12903_2018_685_MOESM1_ESM.pdf [file 12903_2018_685_MOESM1_ESM.pdf]

Items on attitude towards HBV, HCV and HIV/AIDS among dentists

| Statement                                                                                                                       | Agree | Uncertain | Disagree |
|---------------------------------------------------------------------------------------------------------------------------------|-------|-----------|----------|
| 1. I would prefer not to treat patients who are HIV/AIDS positive.                                                              |       |           |          |
| 2. Dentists should have the opportunity to refuse to treat patients with HBV, HCV and HIV/AIDS.                                 |       |           |          |
| 3. Patients with HVB, HCV and HIV/AIDS should receive dental treatment in specialized clinics.                                  |       |           |          |
| 4. If I found out that my longtime patient had HBV, HCV and HIV/AIDS, I would stop treating him.                                |       |           |          |
| 5. Fear and concern about being infected with HVB, HCV and HIV/AIDS is one of the reasons to refuse infected patients.          |       |           |          |
| 6. Dentists are anxious about increasing the transmission risk of the HBV, HCV and HIV/AIDS while treating them.                |       |           |          |
| 7. Regardless of clinical precautions, there is risk for HIV/AIDS and hepatitis transmission from patient to dentist.           |       |           |          |
| 8. Regardless of clinical precautions, there is a risk for HIV/AIDS and hepatitis transmission from dentist to patient.         |       |           |          |
| 9. Regardless of clinical precautions, there is a risk for HIV/AIDS and hepatitis transmission from patient to patient.         |       |           |          |
| 10. Dentists have a professional obligation to treat HIV/AIDS positive patients.                                                |       |           |          |
| 11. Infection control measures for preventing HIV/AIDS transmission should be more than those for the prevention of HBV and HCV |       |           |          |
| 12. Infection control principles are adequate for preventing the HBV, HCV and HIV/AIDS transmission.                            |       |           |          |
| 13. All patients should be considered potentially infectious.                                                                   |       |           |          |

Items on practice regarding HBV, HCV and HIV/AIDS among dentists

| Statement                                                                                          | Always | Often | Sometimes | Never |
|----------------------------------------------------------------------------------------------------|--------|-------|-----------|-------|
| 1. Using latex gloves                                                                              |        |       |           |       |
| 2. Changing gloves between patients                                                                |        |       |           |       |
| 3. Using facemask                                                                                  |        |       |           |       |
| 4. Changing face mask between patients                                                             |        |       |           |       |
| 5. Using gown                                                                                      |        |       |           |       |
| 6. Washing hands before treatment                                                                  |        |       |           |       |
| 7. Washing hands after treatment                                                                   |        |       |           |       |
| 8. Changing dental unit cover daily                                                                |        |       |           |       |
| 9. Using protective glasses                                                                        |        |       |           |       |
| 10. Washing protective glasses                                                                     |        |       |           |       |
| 11. Covering all instruments to prevent contamination                                              |        |       |           |       |
| 12. Recapping needles                                                                              |        |       |           |       |
| 13. Using gown for patient                                                                         |        |       |           |       |
| 14. Sterilizing your instruments by autoclave or dry heat                                          |        |       |           |       |
| 15. Accepting patients with HVB, HCV and HIV/AIDS infections                                       |        |       |           |       |
| 16. Willing to work with the centers that service the patients infected with HVB, HCV and HIV/AIDS |        |       |           |       |
| 17. Existence of fear and concern during treatment of the patients with HBV, HCV and HIV/AIDS      |        |       |           |       |
